# Supplementary material for: Fourteen-days Evolution of COVID-19 Symptoms During the Third Wave in Non-vaccinated Subjects and Effects of Hesperidin Therapy: A randomized, double-blinded, placebo-controlled study
Source: bioRxiv or medRxiv preprint supplement (doi:10.1101/2021.10.04.21264483), 2021-10-07
Supplement: Supplementary file [file media-3.pdf]

2 - Efficacy Analysis  
2.2 - Secondary Analysis

Table 2.2.3a - Summary of and Statistical Analysis for Presence of Cough at Day 1 to 14, ITT Population

|       |     | Placebo<br>N=109 | Hesperidin<br>N=107 | All<br>N=216 |
|-------|-----|------------------|---------------------|--------------|
| DAY 1 | n   | 107              | 105                 | 212          |
|       | No  | 40 ( 37.4%)      | 43 ( 41.0%)         | 83 ( 39.2%)  |
|       | Yes | 67 ( 62.6%)      | 62 ( 59.0%)         | 129 ( 60.8%) |
| DAY 2 | n   | 106              | 105                 | 211          |
|       | No  | 44 ( 41.5%)      | 43 ( 41.0%)         | 87 ( 41.2%)  |
|       | Yes | 62 ( 58.5%)      | 62 ( 59.0%)         | 124 ( 58.8%) |
| DAY 3 | n   | 103              | 102                 | 205          |
|       | No  | 49 ( 47.6%)      | 48 ( 47.1%)         | 97 ( 47.3%)  |
|       | Yes | 54 ( 52.4%)      | 54 ( 52.9%)         | 108 ( 52.7%) |
| DAY 4 | n   | 103              | 96                  | 199          |
|       | No  | 46 ( 44.7%)      | 47 ( 49.0%)         | 93 ( 46.7%)  |
|       | Yes | 57 ( 55.3%)      | 49 ( 51.0%)         | 106 ( 53.3%) |
| DAY 5 | n   | 102              | 95                  | 197          |
|       | No  | 53 ( 52.0%)      | 52 ( 54.7%)         | 105 ( 53.3%) |
|       | Yes | 49 ( 48.0%)      | 43 ( 45.3%)         | 92 ( 46.7%)  |
| DAY 6 | n   | 103              | 92                  | 195          |
|       | No  | 55 ( 53.4%)      | 54 ( 58.7%)         | 109 ( 55.9%) |
|       | Yes | 48 ( 46.6%)      | 38 ( 41.3%)         | 86 ( 44.1%)  |
| DAY 7 | n   | 102              | 91                  | 193          |
|       | No  | 57 ( 55.9%)      | 54 ( 59.3%)         | 111 ( 57.5%) |
|       | Yes | 45 ( 44.1%)      | 37 ( 40.7%)         | 82 ( 42.5%)  |
| DAY 8 | n   | 101              | 90                  | 191          |
|       | No  | 64 ( 63.4%)      | 58 ( 64.4%)         | 122 ( 63.9%) |
|       | Yes | 37 ( 36.6%)      | 32 ( 35.6%)         | 69 ( 36.1%)  |
| DAY 9 | n   | 100              | 89                  | 189          |
|       | No  | 61 ( 61.0%)      | 62 ( 69.7%)         | 123 ( 65.1%) |
|       | Yes | 39 ( 39.0%)      | 27 ( 30.3%)         | 66 ( 34.9%)  |

Note:

Comparaisons at day 3,7,10 and 14 are considered for secondary analysis. The other days are used for exploratory analysis.

2 - Efficacy Analysis  
 2.2 - Secondary Analysis

Table 2.2.3a - Summary of and Statistical Analysis for Presence of Cough at Day 1 to 14, ITT Population

|        |     | Placebo<br>N=109 | Hesperidin<br>N=107 | All<br>N=216 |
|--------|-----|------------------|---------------------|--------------|
| DAY 10 | n   | 100              | 90                  | 190          |
|        | No  | 65 ( 65.0%)      | 64 ( 71.1%)         | 129 ( 67.9%) |
|        | Yes | 35 ( 35.0%)      | 26 ( 28.9%)         | 61 ( 32.1%)  |
| DAY 11 | n   | 98               | 86                  | 184          |
|        | No  | 66 ( 67.3%)      | 64 ( 74.4%)         | 130 ( 70.7%) |
|        | Yes | 32 ( 32.7%)      | 22 ( 25.6%)         | 54 ( 29.3%)  |
| DAY 12 | n   | 99               | 85                  | 184          |
|        | No  | 68 ( 68.7%)      | 62 ( 72.9%)         | 130 ( 70.7%) |
|        | Yes | 31 ( 31.3%)      | 23 ( 27.1%)         | 54 ( 29.3%)  |
| DAY 13 | n   | 98               | 83                  | 181          |
|        | No  | 67 ( 68.4%)      | 64 ( 77.1%)         | 131 ( 72.4%) |
|        | Yes | 31 ( 31.6%)      | 19 ( 22.9%)         | 50 ( 27.6%)  |
| DAY 14 | n   | 95               | 79                  | 174          |
|        | No  | 66 ( 69.5%)      | 58 ( 73.4%)         | 124 ( 71.3%) |
|        | Yes | 29 ( 30.5%)      | 21 ( 26.6%)         | 50 ( 28.7%)  |

Note:

Comparaisons at day 3,7,10 and 14 are considered for secondary analysis. The other days are used for exploratory analysis.

2 – Efficacy Analysis

2.2 – Secondary Analysis

Table 2.2.3a – Summary of and Statistical Analysis for Presence of Cough at Day 1 to 14, ITT Population (continued)

Generalized linear mixed model (repeated binary logistic regression) with terms for treatment group, time and treatment group x time interaction

| Contrast                        | OR (95% CI)       | P-value |
|---------------------------------|-------------------|---------|
| Hesperidin vs Placebo at Day 3  | 1.02 (0.59; 1.77) | 0.9416  |
| Hesperidin vs Placebo at Day 7  | 0.87 (0.49; 1.55) | 0.6296  |
| Hesperidin vs Placebo at Day 10 | 0.75 (0.41; 1.40) | 0.3711  |
| Hesperidin vs Placebo at Day 14 | 0.82 (0.42; 1.61) | 0.5696  |

2 - Efficacy Analysis  
2.2 - Secondary Analysis

Table 2.2.3b - Summary of and Statistical Analysis for Presence of Fever at Day 1 to 14, ITT Population

|       |     | Placebo<br>N=109 | Hesperidin<br>N=107 | All<br>N=216 |
|-------|-----|------------------|---------------------|--------------|
| DAY 1 | n   | 105              | 102                 | 207          |
|       | No  | 100 ( 95.2%)     | 99 ( 97.1%)         | 199 ( 96.1%) |
|       | Yes | 5 ( 4.8%)        | 3 ( 2.9%)           | 8 ( 3.9%)    |
| DAY 2 | n   | 105              | 103                 | 208          |
|       | No  | 101 ( 96.2%)     | 100 ( 97.1%)        | 201 ( 96.6%) |
|       | Yes | 4 ( 3.8%)        | 3 ( 2.9%)           | 7 ( 3.4%)    |
| DAY 3 | n   | 102              | 101                 | 203          |
|       | No  | 96 ( 94.1%)      | 96 ( 95.0%)         | 192 ( 94.6%) |
|       | Yes | 6 ( 5.9%)        | 5 ( 5.0%)           | 11 ( 5.4%)   |
| DAY 4 | n   | 102              | 95                  | 197          |
|       | No  | 99 ( 97.1%)      | 92 ( 96.8%)         | 191 ( 97.0%) |
|       | Yes | 3 ( 2.9%)        | 3 ( 3.2%)           | 6 ( 3.0%)    |
| DAY 5 | n   | 102              | 94                  | 196          |
|       | No  | 98 ( 96.1%)      | 89 ( 94.7%)         | 187 ( 95.4%) |
|       | Yes | 4 ( 3.9%)        | 5 ( 5.3%)           | 9 ( 4.6%)    |
| DAY 6 | n   | 102              | 91                  | 193          |
|       | No  | 99 ( 97.1%)      | 88 ( 96.7%)         | 187 ( 96.9%) |
|       | Yes | 3 ( 2.9%)        | 3 ( 3.3%)           | 6 ( 3.1%)    |
| DAY 7 | n   | 101              | 90                  | 191          |
|       | No  | 97 ( 96.0%)      | 87 ( 96.7%)         | 184 ( 96.3%) |
|       | Yes | 4 ( 4.0%)        | 3 ( 3.3%)           | 7 ( 3.7%)    |
| DAY 8 | n   | 100              | 90                  | 190          |
|       | No  | 97 ( 97.0%)      | 87 ( 96.7%)         | 184 ( 96.8%) |
|       | Yes | 3 ( 3.0%)        | 3 ( 3.3%)           | 6 ( 3.2%)    |
| DAY 9 | n   | 99               | 89                  | 188          |
|       | No  | 98 ( 99.0%)      | 87 ( 97.8%)         | 185 ( 98.4%) |
|       | Yes | 1 ( 1.0%)        | 2 ( 2.2%)           | 3 ( 1.6%)    |

Note:

Comparaisons at day 3,7,10 and 14 are considered for secondary analysis. The other days are used for exploratory analysis.

2 - Efficacy Analysis  
 2.2 - Secondary Analysis

Table 2.2.3b - Summary of and Statistical Analysis for Presence of Fever at Day 1 to 14, ITT Population

|        |     | Placebo<br>N=109 | Hesperidin<br>N=107 | All<br>N=216 |
|--------|-----|------------------|---------------------|--------------|
| DAY 10 | n   | 99               | 90                  | 189          |
|        | No  | 97 ( 98.0%)      | 87 ( 96.7%)         | 184 ( 97.4%) |
|        | Yes | 2 ( 2.0%)        | 3 ( 3.3%)           | 5 ( 2.6%)    |
| DAY 11 | n   | 97               | 86                  | 183          |
|        | No  | 96 ( 99.0%)      | 84 ( 97.7%)         | 180 ( 98.4%) |
|        | Yes | 1 ( 1.0%)        | 2 ( 2.3%)           | 3 ( 1.6%)    |
| DAY 12 | n   | 98               | 85                  | 183          |
|        | No  | 97 ( 99.0%)      | 84 ( 98.8%)         | 181 ( 98.9%) |
|        | Yes | 1 ( 1.0%)        | 1 ( 1.2%)           | 2 ( 1.1%)    |
| DAY 13 | n   | 97               | 83                  | 180          |
|        | No  | 96 ( 99.0%)      | 82 ( 98.8%)         | 178 ( 98.9%) |
|        | Yes | 1 ( 1.0%)        | 1 ( 1.2%)           | 2 ( 1.1%)    |
| DAY 14 | n   | 94               | 79                  | 173          |
|        | No  | 93 ( 98.9%)      | 79 (100.0%)         | 172 ( 99.4%) |
|        | Yes | 1 ( 1.1%)        | 0 ( 0.0%)           | 1 ( 0.6%)    |

Note:  
 Comparisons at day 3,7,10 and 14 are considered for secondary analysis. The other days are used for exploratory analysis.

2 – Efficacy Analysis

2.2 – Secondary Analysis

Table 2.2.3b – Summary of and Statistical Analysis for Presence of Fever at Day 1 to 14, ITT Population (continued)

Generalized linear mixed model (repeated binary logistic regression) with terms for treatment group, time and treatment group x time interaction

| Contrast                        | OR (95% CI)       | P-value |
|---------------------------------|-------------------|---------|
| Hesperidin vs Placebo at Day 3  | 0.83 (0.26; 2.67) | 0.7583  |
| Hesperidin vs Placebo at Day 7  | 0.84 (0.20; 3.58) | 0.8091  |
| Hesperidin vs Placebo at Day 10 | 1.67 (0.30; 9.42) | 0.5591  |
| Hesperidin vs Placebo at Day 14 | 0.00 (0.00; ND)   | 0.9983  |

2 - Efficacy Analysis  
2.2 - Secondary Analysis

Table 2.2.3c - Summary of and Statistical Analysis for Presence of Feverish or Chills at Day 1 to 14, ITT population

|       |     | Placebo<br>N=109 | Hesperidin<br>N=107 | All<br>N=216 |
|-------|-----|------------------|---------------------|--------------|
| DAY 1 | n   | 107              | 105                 | 212          |
|       | No  | 75 ( 70.1%)      | 69 ( 65.7%)         | 144 ( 67.9%) |
|       | Yes | 32 ( 29.9%)      | 36 ( 34.3%)         | 68 ( 32.1%)  |
| DAY 2 | n   | 106              | 105                 | 211          |
|       | No  | 82 ( 77.4%)      | 70 ( 66.7%)         | 152 ( 72.0%) |
|       | Yes | 24 ( 22.6%)      | 35 ( 33.3%)         | 59 ( 28.0%)  |
| DAY 3 | n   | 103              | 102                 | 205          |
|       | No  | 82 ( 79.6%)      | 78 ( 76.5%)         | 160 ( 78.0%) |
|       | Yes | 21 ( 20.4%)      | 24 ( 23.5%)         | 45 ( 22.0%)  |
| DAY 4 | n   | 103              | 96                  | 199          |
|       | No  | 89 ( 86.4%)      | 77 ( 80.2%)         | 166 ( 83.4%) |
|       | Yes | 14 ( 13.6%)      | 19 ( 19.8%)         | 33 ( 16.6%)  |
| DAY 5 | n   | 102              | 95                  | 197          |
|       | No  | 89 ( 87.3%)      | 79 ( 83.2%)         | 168 ( 85.3%) |
|       | Yes | 13 ( 12.7%)      | 16 ( 16.8%)         | 29 ( 14.7%)  |
| DAY 6 | n   | 103              | 92                  | 195          |
|       | No  | 93 ( 90.3%)      | 79 ( 85.9%)         | 172 ( 88.2%) |
|       | Yes | 10 ( 9.7%)       | 13 ( 14.1%)         | 23 ( 11.8%)  |
| DAY 7 | n   | 102              | 91                  | 193          |
|       | No  | 92 ( 90.2%)      | 81 ( 89.0%)         | 173 ( 89.6%) |
|       | Yes | 10 ( 9.8%)       | 10 ( 11.0%)         | 20 ( 10.4%)  |
| DAY 8 | n   | 101              | 90                  | 191          |
|       | No  | 91 ( 90.1%)      | 82 ( 91.1%)         | 173 ( 90.6%) |
|       | Yes | 10 ( 9.9%)       | 8 ( 8.9%)           | 18 ( 9.4%)   |
| DAY 9 | n   | 100              | 89                  | 189          |
|       | No  | 93 ( 93.0%)      | 85 ( 95.5%)         | 178 ( 94.2%) |
|       | Yes | 7 ( 7.0%)        | 4 ( 4.5%)           | 11 ( 5.8%)   |

Note:

Comparaisons at day 3,7,10 and 14 are considered for secondary analysis. The other days are used for exploratory analysis.

2 - Efficacy Analysis  
 2.2 - Secondary Analysis

Table 2.2.3c - Summary of and Statistical Analysis for Presence of Feverish or Chills at Day 1 to 14, ITT population

|        |     | Placebo<br>N=109 | Hesperidin<br>N=107 | All<br>N=216 |
|--------|-----|------------------|---------------------|--------------|
| DAY 10 | n   | 100              | 90                  | 190          |
|        | No  | 94 ( 94.0%)      | 86 ( 95.6%)         | 180 ( 94.7%) |
|        | Yes | 6 ( 6.0%)        | 4 ( 4.4%)           | 10 ( 5.3%)   |
| DAY 11 | n   | 98               | 86                  | 184          |
|        | No  | 93 ( 94.9%)      | 83 ( 96.5%)         | 176 ( 95.7%) |
|        | Yes | 5 ( 5.1%)        | 3 ( 3.5%)           | 8 ( 4.3%)    |
| DAY 12 | n   | 99               | 85                  | 184          |
|        | No  | 95 ( 96.0%)      | 83 ( 97.6%)         | 178 ( 96.7%) |
|        | Yes | 4 ( 4.0%)        | 2 ( 2.4%)           | 6 ( 3.3%)    |
| DAY 13 | n   | 98               | 83                  | 181          |
|        | No  | 96 ( 98.0%)      | 82 ( 98.8%)         | 178 ( 98.3%) |
|        | Yes | 2 ( 2.0%)        | 1 ( 1.2%)           | 3 ( 1.7%)    |
| DAY 14 | n   | 95               | 79                  | 174          |
|        | No  | 92 ( 96.8%)      | 78 ( 98.7%)         | 170 ( 97.7%) |
|        | Yes | 3 ( 3.2%)        | 1 ( 1.3%)           | 4 ( 2.3%)    |

Note:

Comparaisons at day 3,7,10 and 14 are considered for secondary analysis. The other days are used for exploratory analysis.



2 – Efficacy Analysis

2.2 – Secondary Analysis

Table 2.2.3c – Summary of and Statistical Analysis for Presence of Feverish or Chills at Day 1 to 14, ITT Population (continued)

Generalized linear mixed model (repeated binary logistic regression) with terms for treatment group, time and treatment group x time interaction

| Contrast                        | OR (95% CI)       | P-value |
|---------------------------------|-------------------|---------|
| Hesperidin vs Placebo at Day 3  | 1.20 (0.62; 2.34) | 0.5894  |
| Hesperidin vs Placebo at Day 7  | 1.14 (0.45; 2.89) | 0.7887  |
| Hesperidin vs Placebo at Day 10 | 0.73 (0.20; 2.70) | 0.6348  |
| Hesperidin vs Placebo at Day 14 | 0.39 (0.04; 3.92) | 0.4257  |

2 - Efficacy Analysis  
2.2 - Secondary Analysis

Table 2.2.3d - Summary of and Statistical Analysis for Presence of Sore Throat at Day 1 to 14, ITT population

|       |     | Placebo<br>N=109 | Hesperidin<br>N=107 | All<br>N=216 |
|-------|-----|------------------|---------------------|--------------|
| DAY 1 | n   | 107              | 105                 | 212          |
|       | No  | 66 ( 61.7%)      | 62 ( 59.0%)         | 128 ( 60.4%) |
|       | Yes | 41 ( 38.3%)      | 43 ( 41.0%)         | 84 ( 39.6%)  |
| DAY 2 | n   | 106              | 105                 | 211          |
|       | No  | 71 ( 67.0%)      | 65 ( 61.9%)         | 136 ( 64.5%) |
|       | Yes | 35 ( 33.0%)      | 40 ( 38.1%)         | 75 ( 35.5%)  |
| DAY 3 | n   | 103              | 102                 | 205          |
|       | No  | 80 ( 77.7%)      | 69 ( 67.6%)         | 149 ( 72.7%) |
|       | Yes | 23 ( 22.3%)      | 33 ( 32.4%)         | 56 ( 27.3%)  |
| DAY 4 | n   | 103              | 96                  | 199          |
|       | No  | 80 ( 77.7%)      | 69 ( 71.9%)         | 149 ( 74.9%) |
|       | Yes | 23 ( 22.3%)      | 27 ( 28.1%)         | 50 ( 25.1%)  |
| DAY 5 | n   | 102              | 95                  | 197          |
|       | No  | 79 ( 77.5%)      | 70 ( 73.7%)         | 149 ( 75.6%) |
|       | Yes | 23 ( 22.5%)      | 25 ( 26.3%)         | 48 ( 24.4%)  |
| DAY 6 | n   | 103              | 92                  | 195          |
|       | No  | 86 ( 83.5%)      | 76 ( 82.6%)         | 162 ( 83.1%) |
|       | Yes | 17 ( 16.5%)      | 16 ( 17.4%)         | 33 ( 16.9%)  |
| DAY 7 | n   | 102              | 91                  | 193          |
|       | No  | 89 ( 87.3%)      | 74 ( 81.3%)         | 163 ( 84.5%) |
|       | Yes | 13 ( 12.7%)      | 17 ( 18.7%)         | 30 ( 15.5%)  |
| DAY 8 | n   | 101              | 90                  | 191          |
|       | No  | 88 ( 87.1%)      | 78 ( 86.7%)         | 166 ( 86.9%) |
|       | Yes | 13 ( 12.9%)      | 12 ( 13.3%)         | 25 ( 13.1%)  |
| DAY 9 | n   | 100              | 89                  | 189          |
|       | No  | 87 ( 87.0%)      | 84 ( 94.4%)         | 171 ( 90.5%) |
|       | Yes | 13 ( 13.0%)      | 5 ( 5.6%)           | 18 ( 9.5%)   |

Note:

Comparaisons at day 3,7,10 and 14 are considered for secondary analysis. The other days are used for exploratory analysis.

2 - Efficacy Analysis  
2.2 - Secondary Analysis

Table 2.2.3d - Summary of and Statistical Analysis for Presence of Sore Throat at Day 1 to 14, ITT population

|        |     | Placebo<br>N=109 | Hesperidin<br>N=107 | All<br>N=216 |
|--------|-----|------------------|---------------------|--------------|
| DAY 10 | n   | 100              | 90                  | 190          |
|        | No  | 92 ( 92.0%)      | 84 ( 93.3%)         | 176 ( 92.6%) |
|        | Yes | 8 ( 8.0%)        | 6 ( 6.7%)           | 14 ( 7.4%)   |
| DAY 11 | n   | 98               | 86                  | 184          |
|        | No  | 90 ( 91.8%)      | 82 ( 95.3%)         | 172 ( 93.5%) |
|        | Yes | 8 ( 8.2%)        | 4 ( 4.7%)           | 12 ( 6.5%)   |
| DAY 12 | n   | 99               | 85                  | 184          |
|        | No  | 93 ( 93.9%)      | 81 ( 95.3%)         | 174 ( 94.6%) |
|        | Yes | 6 ( 6.1%)        | 4 ( 4.7%)           | 10 ( 5.4%)   |
| DAY 13 | n   | 98               | 83                  | 181          |
|        | No  | 93 ( 94.9%)      | 81 ( 97.6%)         | 174 ( 96.1%) |
|        | Yes | 5 ( 5.1%)        | 2 ( 2.4%)           | 7 ( 3.9%)    |
| DAY 14 | n   | 95               | 79                  | 174          |
|        | No  | 91 ( 95.8%)      | 76 ( 96.2%)         | 167 ( 96.0%) |
|        | Yes | 4 ( 4.2%)        | 3 ( 3.8%)           | 7 ( 4.0%)    |

Note:

Comparaisons at day 3,7,10 and 14 are considered for secondary analysis. The other days are used for exploratory analysis.

2 – Efficacy Analysis

2.2 – Secondary Analysis

Table 2.2.3d – Summary of and Statistical Analysis for Presence of Sore Throat at Day 1 to 14, ITT Population (continued)

Generalized linear mixed model (repeated binary logistic regression) with terms for treatment group, time and treatment group x time interaction

| Contrast                        | OR (95% CI)       | P-value |
|---------------------------------|-------------------|---------|
| Hesperidin vs Placebo at Day 3  | 1.66 (0.89; 3.11) | 0.1113  |
| Hesperidin vs Placebo at Day 7  | 1.57 (0.71; 3.47) | 0.2613  |
| Hesperidin vs Placebo at Day 10 | 0.82 (0.27; 2.49) | 0.7273  |
| Hesperidin vs Placebo at Day 14 | 0.90 (0.19; 4.19) | 0.8909  |

2 - Efficacy Analysis  
2.2 - Secondary Analysis

Table 2.2.3e - Summary of and Statistical Analysis for Presence of Runny Nose at Day 1 to 14, ITT population

|       |     | Placebo<br>N=109 | Hesperidin<br>N=107 | All<br>N=216 |
|-------|-----|------------------|---------------------|--------------|
| DAY 1 | n   | 107              | 105                 | 212          |
|       | No  | 57 ( 53.3%)      | 52 ( 49.5%)         | 109 ( 51.4%) |
|       | Yes | 50 ( 46.7%)      | 53 ( 50.5%)         | 103 ( 48.6%) |
| DAY 2 | n   | 106              | 105                 | 211          |
|       | No  | 59 ( 55.7%)      | 50 ( 47.6%)         | 109 ( 51.7%) |
|       | Yes | 47 ( 44.3%)      | 55 ( 52.4%)         | 102 ( 48.3%) |
| DAY 3 | n   | 103              | 102                 | 205          |
|       | No  | 65 ( 63.1%)      | 54 ( 52.9%)         | 119 ( 58.0%) |
|       | Yes | 38 ( 36.9%)      | 48 ( 47.1%)         | 86 ( 42.0%)  |
| DAY 4 | n   | 103              | 96                  | 199          |
|       | No  | 68 ( 66.0%)      | 56 ( 58.3%)         | 124 ( 62.3%) |
|       | Yes | 35 ( 34.0%)      | 40 ( 41.7%)         | 75 ( 37.7%)  |
| DAY 5 | n   | 102              | 95                  | 197          |
|       | No  | 70 ( 68.6%)      | 59 ( 62.1%)         | 129 ( 65.5%) |
|       | Yes | 32 ( 31.4%)      | 36 ( 37.9%)         | 68 ( 34.5%)  |
| DAY 6 | n   | 103              | 92                  | 195          |
|       | No  | 74 ( 71.8%)      | 64 ( 69.6%)         | 138 ( 70.8%) |
|       | Yes | 29 ( 28.2%)      | 28 ( 30.4%)         | 57 ( 29.2%)  |
| DAY 7 | n   | 102              | 91                  | 193          |
|       | No  | 80 ( 78.4%)      | 66 ( 72.5%)         | 146 ( 75.6%) |
|       | Yes | 22 ( 21.6%)      | 25 ( 27.5%)         | 47 ( 24.4%)  |
| DAY 8 | n   | 101              | 90                  | 191          |
|       | No  | 78 ( 77.2%)      | 66 ( 73.3%)         | 144 ( 75.4%) |
|       | Yes | 23 ( 22.8%)      | 24 ( 26.7%)         | 47 ( 24.6%)  |
| DAY 9 | n   | 100              | 89                  | 189          |
|       | No  | 78 ( 78.0%)      | 68 ( 76.4%)         | 146 ( 77.2%) |
|       | Yes | 22 ( 22.0%)      | 21 ( 23.6%)         | 43 ( 22.8%)  |

Note:

Comparaisons at day 3,7,10 and 14 are considered for secondary analysis. The other days are used for exploratory analysis.

2 - Efficacy Analysis  
2.2 - Secondary Analysis

Table 2.2.3e - Summary of and Statistical Analysis for Presence of Runny Nose at Day 1 to 14, ITT population

|        |     | Placebo<br>N=109 | Hesperidin<br>N=107 | All<br>N=216 |
|--------|-----|------------------|---------------------|--------------|
| DAY 10 | n   | 100              | 90                  | 190          |
|        | No  | 83 ( 83.0%)      | 72 ( 80.0%)         | 155 ( 81.6%) |
|        | Yes | 17 ( 17.0%)      | 18 ( 20.0%)         | 35 ( 18.4%)  |
| DAY 11 | n   | 98               | 86                  | 184          |
|        | No  | 83 ( 84.7%)      | 71 ( 82.6%)         | 154 ( 83.7%) |
|        | Yes | 15 ( 15.3%)      | 15 ( 17.4%)         | 30 ( 16.3%)  |
| DAY 12 | n   | 99               | 85                  | 184          |
|        | No  | 86 ( 86.9%)      | 72 ( 84.7%)         | 158 ( 85.9%) |
|        | Yes | 13 ( 13.1%)      | 13 ( 15.3%)         | 26 ( 14.1%)  |
| DAY 13 | n   | 98               | 83                  | 181          |
|        | No  | 86 ( 87.8%)      | 69 ( 83.1%)         | 155 ( 85.6%) |
|        | Yes | 12 ( 12.2%)      | 14 ( 16.9%)         | 26 ( 14.4%)  |
| DAY 14 | n   | 95               | 79                  | 174          |
|        | No  | 85 ( 89.5%)      | 67 ( 84.8%)         | 152 ( 87.4%) |
|        | Yes | 10 ( 10.5%)      | 12 ( 15.2%)         | 22 ( 12.6%)  |

Note:  
Comparaisons at day 3,7,10 and 14 are considered for secondary analysis. The other days are used for exploratory analysis.

2 – Efficacy Analysis

2.2 – Secondary Analysis

Table 2.2.3e – Summary of and Statistical Analysis for Presence of Runny Nose at Day 1 to 14, ITT Population (continued)

Generalized linear mixed model (repeated binary logistic regression) with terms for treatment group, time and treatment group x time interaction

| Contrast                        | OR (95% CI)       | P-value |
|---------------------------------|-------------------|---------|
| Hesperidin vs Placebo at Day 3  | 1.52 (0.87; 2.67) | 0.1438  |
| Hesperidin vs Placebo at Day 7  | 1.38 (0.71; 2.68) | 0.3440  |
| Hesperidin vs Placebo at Day 10 | 1.22 (0.58; 2.56) | 0.5968  |
| Hesperidin vs Placebo at Day 14 | 1.52 (0.62; 3.76) | 0.3620  |

2 - Efficacy Analysis  
2.2 - Secondary Analysis

Table 2.2.3f - Summary of and Statistical Analysis for Presence of Shortness of Breath/Difficulty Breathing at Day 1 to 14, ITT population

|       |     | Placebo<br>N=109 | Hesperidin<br>N=107 | All<br>N=216 |
|-------|-----|------------------|---------------------|--------------|
| DAY 1 | n   | 107              | 105                 | 212          |
|       | No  | 65 ( 60.7%)      | 54 ( 51.4%)         | 119 ( 56.1%) |
|       | Yes | 42 ( 39.3%)      | 51 ( 48.6%)         | 93 ( 43.9%)  |
| DAY 2 | n   | 106              | 105                 | 211          |
|       | No  | 62 ( 58.5%)      | 52 ( 49.5%)         | 114 ( 54.0%) |
|       | Yes | 44 ( 41.5%)      | 53 ( 50.5%)         | 97 ( 46.0%)  |
| DAY 3 | n   | 103              | 102                 | 205          |
|       | No  | 68 ( 66.0%)      | 56 ( 54.9%)         | 124 ( 60.5%) |
|       | Yes | 35 ( 34.0%)      | 46 ( 45.1%)         | 81 ( 39.5%)  |
| DAY 4 | n   | 103              | 96                  | 199          |
|       | No  | 68 ( 66.0%)      | 58 ( 60.4%)         | 126 ( 63.3%) |
|       | Yes | 35 ( 34.0%)      | 38 ( 39.6%)         | 73 ( 36.7%)  |
| DAY 5 | n   | 102              | 95                  | 197          |
|       | No  | 71 ( 69.6%)      | 56 ( 58.9%)         | 127 ( 64.5%) |
|       | Yes | 31 ( 30.4%)      | 39 ( 41.1%)         | 70 ( 35.5%)  |
| DAY 6 | n   | 103              | 92                  | 195          |
|       | No  | 76 ( 73.8%)      | 56 ( 60.9%)         | 132 ( 67.7%) |
|       | Yes | 27 ( 26.2%)      | 36 ( 39.1%)         | 63 ( 32.3%)  |
| DAY 7 | n   | 102              | 91                  | 193          |
|       | No  | 72 ( 70.6%)      | 63 ( 69.2%)         | 135 ( 69.9%) |
|       | Yes | 30 ( 29.4%)      | 28 ( 30.8%)         | 58 ( 30.1%)  |
| DAY 8 | n   | 101              | 90                  | 191          |
|       | No  | 73 ( 72.3%)      | 63 ( 70.0%)         | 136 ( 71.2%) |
|       | Yes | 28 ( 27.7%)      | 27 ( 30.0%)         | 55 ( 28.8%)  |
| DAY 9 | n   | 100              | 89                  | 189          |
|       | No  | 79 ( 79.0%)      | 64 ( 71.9%)         | 143 ( 75.7%) |
|       | Yes | 21 ( 21.0%)      | 25 ( 28.1%)         | 46 ( 24.3%)  |

Note:

Comparisons at day 3,7,10 and 14 are considered for secondary analysis. The other days are used for exploratory analysis.



2 - Efficacy Analysis  
2.2 - Secondary Analysis

Table 2.2.3f - Summary of and Statistical Analysis for Presence of Shortness of Breath/Difficulty Breathing at Day 1 to 14, ITT population

|        |     | Placebo<br>N=109 | Hesperidin<br>N=107 | All<br>N=216 |
|--------|-----|------------------|---------------------|--------------|
| DAY 10 | n   | 100              | 90                  | 190          |
|        | No  | 82 ( 82.0%)      | 71 ( 78.9%)         | 153 ( 80.5%) |
|        | Yes | 18 ( 18.0%)      | 19 ( 21.1%)         | 37 ( 19.5%)  |
| DAY 11 | n   | 98               | 86                  | 184          |
|        | No  | 80 ( 81.6%)      | 70 ( 81.4%)         | 150 ( 81.5%) |
|        | Yes | 18 ( 18.4%)      | 16 ( 18.6%)         | 34 ( 18.5%)  |
| DAY 12 | n   | 99               | 85                  | 184          |
|        | No  | 84 ( 84.8%)      | 73 ( 85.9%)         | 157 ( 85.3%) |
|        | Yes | 15 ( 15.2%)      | 12 ( 14.1%)         | 27 ( 14.7%)  |
| DAY 13 | n   | 98               | 83                  | 181          |
|        | No  | 83 ( 84.7%)      | 70 ( 84.3%)         | 153 ( 84.5%) |
|        | Yes | 15 ( 15.3%)      | 13 ( 15.7%)         | 28 ( 15.5%)  |
| DAY 14 | n   | 95               | 79                  | 174          |
|        | No  | 82 ( 86.3%)      | 65 ( 82.3%)         | 147 ( 84.5%) |
|        | Yes | 13 ( 13.7%)      | 14 ( 17.7%)         | 27 ( 15.5%)  |

Note:  
Comparaisons at day 3,7,10 and 14 are considered for secondary analysis. The other days are used for exploratory analysis.

2 – Efficacy Analysis

2.2 – Secondary Analysis

Table 2.2.3f – Summary of and Statistical Analysis for Presence of Shortness of Breath/Difficulty Breathing at Day 1 to 14, ITT Population  
 (continued)

Generalized linear mixed model (repeated binary logistic regression) with terms for treatment group, time and treatment group x time interaction

| Contrast                        | OR (95% CI)       | P-value |
|---------------------------------|-------------------|---------|
| Hesperidin vs Placebo at Day 3  | 1.60 (0.90; 2.82) | 0.1068  |
| Hesperidin vs Placebo at Day 7  | 1.07 (0.57; 1.98) | 0.8382  |
| Hesperidin vs Placebo at Day 10 | 1.22 (0.59; 2.51) | 0.5912  |
| Hesperidin vs Placebo at Day 14 | 1.36 (0.59; 3.11) | 0.4677  |

2 - Efficacy Analysis  
2.2 - Secondary Analysis

Table 2.2.3g - Summary of and Statistical Analysis for Presence of Nausea/Vomiting at Day 1 to 14, ITT population

|       |     | Placebo<br>N=109 | Hesperidin<br>N=107 | All<br>N=216 |
|-------|-----|------------------|---------------------|--------------|
| DAY 1 | n   | 107              | 105                 | 212          |
|       | No  | 95 ( 88.8%)      | 83 ( 79.0%)         | 178 ( 84.0%) |
|       | Yes | 12 ( 11.2%)      | 22 ( 21.0%)         | 34 ( 16.0%)  |
| DAY 2 | n   | 106              | 105                 | 211          |
|       | No  | 91 ( 85.8%)      | 83 ( 79.0%)         | 174 ( 82.5%) |
|       | Yes | 15 ( 14.2%)      | 22 ( 21.0%)         | 37 ( 17.5%)  |
| DAY 3 | n   | 103              | 102                 | 205          |
|       | No  | 91 ( 88.3%)      | 81 ( 79.4%)         | 172 ( 83.9%) |
|       | Yes | 12 ( 11.7%)      | 21 ( 20.6%)         | 33 ( 16.1%)  |
| DAY 4 | n   | 103              | 96                  | 199          |
|       | No  | 94 ( 91.3%)      | 81 ( 84.4%)         | 175 ( 87.9%) |
|       | Yes | 9 ( 8.7%)        | 15 ( 15.6%)         | 24 ( 12.1%)  |
| DAY 5 | n   | 102              | 95                  | 197          |
|       | No  | 95 ( 93.1%)      | 80 ( 84.2%)         | 175 ( 88.8%) |
|       | Yes | 7 ( 6.9%)        | 15 ( 15.8%)         | 22 ( 11.2%)  |
| DAY 6 | n   | 103              | 92                  | 195          |
|       | No  | 97 ( 94.2%)      | 79 ( 85.9%)         | 176 ( 90.3%) |
|       | Yes | 6 ( 5.8%)        | 13 ( 14.1%)         | 19 ( 9.7%)   |
| DAY 7 | n   | 102              | 91                  | 193          |
|       | No  | 91 ( 89.2%)      | 82 ( 90.1%)         | 173 ( 89.6%) |
|       | Yes | 11 ( 10.8%)      | 9 ( 9.9%)           | 20 ( 10.4%)  |
| DAY 8 | n   | 101              | 90                  | 191          |
|       | No  | 95 ( 94.1%)      | 81 ( 90.0%)         | 176 ( 92.1%) |
|       | Yes | 6 ( 5.9%)        | 9 ( 10.0%)          | 15 ( 7.9%)   |
| DAY 9 | n   | 100              | 89                  | 189          |
|       | No  | 96 ( 96.0%)      | 81 ( 91.0%)         | 177 ( 93.7%) |
|       | Yes | 4 ( 4.0%)        | 8 ( 9.0%)           | 12 ( 6.3%)   |

Note:

Comparisons at day 3,7,10 and 14 are considered for secondary analysis. The other days are used for exploratory analysis.

2 - Efficacy Analysis  
2.2 - Secondary Analysis

Table 2.2.3g - Summary of and Statistical Analysis for Presence of Nausea/Vomiting at Day 1 to 14, ITT population

|        |     | Placebo<br>N=109 | Hesperidin<br>N=107 | All<br>N=216 |
|--------|-----|------------------|---------------------|--------------|
| DAY 10 | n   | 100              | 90                  | 190          |
|        | No  | 95 ( 95.0%)      | 84 ( 93.3%)         | 179 ( 94.2%) |
|        | Yes | 5 ( 5.0%)        | 6 ( 6.7%)           | 11 ( 5.8%)   |
| DAY 11 | n   | 98               | 86                  | 184          |
|        | No  | 93 ( 94.9%)      | 82 ( 95.3%)         | 175 ( 95.1%) |
|        | Yes | 5 ( 5.1%)        | 4 ( 4.7%)           | 9 ( 4.9%)    |
| DAY 12 | n   | 99               | 85                  | 184          |
|        | No  | 96 ( 97.0%)      | 83 ( 97.6%)         | 179 ( 97.3%) |
|        | Yes | 3 ( 3.0%)        | 2 ( 2.4%)           | 5 ( 2.7%)    |
| DAY 13 | n   | 98               | 83                  | 181          |
|        | No  | 94 ( 95.9%)      | 82 ( 98.8%)         | 176 ( 97.2%) |
|        | Yes | 4 ( 4.1%)        | 1 ( 1.2%)           | 5 ( 2.8%)    |
| DAY 14 | n   | 95               | 79                  | 174          |
|        | No  | 93 ( 97.9%)      | 77 ( 97.5%)         | 170 ( 97.7%) |
|        | Yes | 2 ( 2.1%)        | 2 ( 2.5%)           | 4 ( 2.3%)    |

Note:  
Comparaisons at day 3,7,10 and 14 are considered for secondary analysis. The other days are used for exploratory analysis.

2 – Efficacy Analysis

2.2 – Secondary Analysis

Table 2.2.3g – Summary of and Statistical Analysis for Presence of Nausea/Vomiting at Day 1 to 14, ITT Population (continued)

Generalized linear mixed model (repeated binary logistic regression) with terms for treatment group, time and treatment group x time interaction

| Contrast                        | OR (95% CI)       | P-value |
|---------------------------------|-------------------|---------|
| Hesperidin vs Placebo at Day 3  | 1.97 (0.91; 4.27) | 0.0875  |
| Hesperidin vs Placebo at Day 7  | 0.91 (0.36; 2.32) | 0.8397  |
| Hesperidin vs Placebo at Day 10 | 1.36 (0.40; 4.65) | 0.6265  |
| Hesperidin vs Placebo at Day 14 | 1.21 (0.16; 8.91) | 0.8528  |

2 - Efficacy Analysis  
2.2 - Secondary Analysis

Table 2.2.3h - Summary of and Statistical Analysis for Presence of Headache at Day 1 to 14, ITT population

|       |     | Placebo<br>N=109 | Hesperidin<br>N=107 | All<br>N=216 |
|-------|-----|------------------|---------------------|--------------|
| DAY 1 | n   | 107              | 105                 | 212          |
|       | No  | 39 ( 36.4%)      | 38 ( 36.2%)         | 77 ( 36.3%)  |
|       | Yes | 68 ( 63.6%)      | 67 ( 63.8%)         | 135 ( 63.7%) |
| DAY 2 | n   | 106              | 105                 | 211          |
|       | No  | 54 ( 50.9%)      | 49 ( 46.7%)         | 103 ( 48.8%) |
|       | Yes | 52 ( 49.1%)      | 56 ( 53.3%)         | 108 ( 51.2%) |
| DAY 3 | n   | 103              | 102                 | 205          |
|       | No  | 62 ( 60.2%)      | 54 ( 52.9%)         | 116 ( 56.6%) |
|       | Yes | 41 ( 39.8%)      | 48 ( 47.1%)         | 89 ( 43.4%)  |
| DAY 4 | n   | 103              | 96                  | 199          |
|       | No  | 68 ( 66.0%)      | 53 ( 55.2%)         | 121 ( 60.8%) |
|       | Yes | 35 ( 34.0%)      | 43 ( 44.8%)         | 78 ( 39.2%)  |
| DAY 5 | n   | 102              | 95                  | 197          |
|       | No  | 66 ( 64.7%)      | 58 ( 61.1%)         | 124 ( 62.9%) |
|       | Yes | 36 ( 35.3%)      | 37 ( 38.9%)         | 73 ( 37.1%)  |
| DAY 6 | n   | 103              | 92                  | 195          |
|       | No  | 73 ( 70.9%)      | 58 ( 63.0%)         | 131 ( 67.2%) |
|       | Yes | 30 ( 29.1%)      | 34 ( 37.0%)         | 64 ( 32.8%)  |
| DAY 7 | n   | 102              | 91                  | 193          |
|       | No  | 68 ( 66.7%)      | 57 ( 62.6%)         | 125 ( 64.8%) |
|       | Yes | 34 ( 33.3%)      | 34 ( 37.4%)         | 68 ( 35.2%)  |
| DAY 8 | n   | 101              | 90                  | 191          |
|       | No  | 74 ( 73.3%)      | 68 ( 75.6%)         | 142 ( 74.3%) |
|       | Yes | 27 ( 26.7%)      | 22 ( 24.4%)         | 49 ( 25.7%)  |
| DAY 9 | n   | 100              | 89                  | 189          |
|       | No  | 79 ( 79.0%)      | 70 ( 78.7%)         | 149 ( 78.8%) |
|       | Yes | 21 ( 21.0%)      | 19 ( 21.3%)         | 40 ( 21.2%)  |

Note:

Comparisons at day 3,7,10 and 14 are considered for secondary analysis. The other days are used for exploratory analysis.

2 - Efficacy Analysis  
2.2 - Secondary Analysis

Table 2.2.3h - Summary of and Statistical Analysis for Presence of Headache at Day 1 to 14, ITT population

|        |     | Placebo<br>N=109 | Hesperidin<br>N=107 | All<br>N=216 |
|--------|-----|------------------|---------------------|--------------|
| DAY 10 | n   | 100              | 90                  | 190          |
|        | No  | 80 ( 80.0%)      | 68 ( 75.6%)         | 148 ( 77.9%) |
|        | Yes | 20 ( 20.0%)      | 22 ( 24.4%)         | 42 ( 22.1%)  |
| DAY 11 | n   | 98               | 86                  | 184          |
|        | No  | 81 ( 82.7%)      | 70 ( 81.4%)         | 151 ( 82.1%) |
|        | Yes | 17 ( 17.3%)      | 16 ( 18.6%)         | 33 ( 17.9%)  |
| DAY 12 | n   | 99               | 85                  | 184          |
|        | No  | 82 ( 82.8%)      | 73 ( 85.9%)         | 155 ( 84.2%) |
|        | Yes | 17 ( 17.2%)      | 12 ( 14.1%)         | 29 ( 15.8%)  |
| DAY 13 | n   | 98               | 83                  | 181          |
|        | No  | 84 ( 85.7%)      | 74 ( 89.2%)         | 158 ( 87.3%) |
|        | Yes | 14 ( 14.3%)      | 9 ( 10.8%)          | 23 ( 12.7%)  |
| DAY 14 | n   | 95               | 79                  | 174          |
|        | No  | 86 ( 90.5%)      | 69 ( 87.3%)         | 155 ( 89.1%) |
|        | Yes | 9 ( 9.5%)        | 10 ( 12.7%)         | 19 ( 10.9%)  |

Note:

Comparaisons at day 3,7,10 and 14 are considered for secondary analysis. The other days are used for exploratory analysis.

2 – Efficacy Analysis

2.2 – Secondary Analysis

Table 2.2.3h – Summary of and Statistical Analysis for Presence of Headache at Day 1 to 14, ITT Population (continued)

Generalized linear mixed model (repeated binary logistic regression) with terms for treatment group, time and treatment group x time interaction

| Contrast                        | OR (95% CI)       | P-value |
|---------------------------------|-------------------|---------|
| Hesperidin vs Placebo at Day 3  | 1.34 (0.77; 2.35) | 0.2983  |
| Hesperidin vs Placebo at Day 7  | 1.19 (0.66; 2.16) | 0.5611  |
| Hesperidin vs Placebo at Day 10 | 1.29 (0.65; 2.58) | 0.4643  |
| Hesperidin vs Placebo at Day 14 | 1.38 (0.53; 3.62) | 0.5063  |



2 - Efficacy Analysis  
2.2 - Secondary Analysis

Table 2.2.3i - Summary of and Statistical Analysis for Presence of General Weakness at Day 1 to 14, ITT population

|       |     | Placebo<br>N=109 | Hesperidin<br>N=107 | All<br>N=216 |
|-------|-----|------------------|---------------------|--------------|
| DAY 1 | n   | 107              | 105                 | 212          |
|       | No  | 40 ( 37.4%)      | 32 ( 30.5%)         | 72 ( 34.0%)  |
|       | Yes | 67 ( 62.6%)      | 73 ( 69.5%)         | 140 ( 66.0%) |
| DAY 2 | n   | 106              | 105                 | 211          |
|       | No  | 45 ( 42.5%)      | 35 ( 33.3%)         | 80 ( 37.9%)  |
|       | Yes | 61 ( 57.5%)      | 70 ( 66.7%)         | 131 ( 62.1%) |
| DAY 3 | n   | 103              | 102                 | 205          |
|       | No  | 48 ( 46.6%)      | 39 ( 38.2%)         | 87 ( 42.4%)  |
|       | Yes | 55 ( 53.4%)      | 63 ( 61.8%)         | 118 ( 57.6%) |
| DAY 4 | n   | 103              | 96                  | 199          |
|       | No  | 49 ( 47.6%)      | 37 ( 38.5%)         | 86 ( 43.2%)  |
|       | Yes | 54 ( 52.4%)      | 59 ( 61.5%)         | 113 ( 56.8%) |
| DAY 5 | n   | 102              | 95                  | 197          |
|       | No  | 53 ( 52.0%)      | 41 ( 43.2%)         | 94 ( 47.7%)  |
|       | Yes | 49 ( 48.0%)      | 54 ( 56.8%)         | 103 ( 52.3%) |
| DAY 6 | n   | 103              | 92                  | 195          |
|       | No  | 62 ( 60.2%)      | 47 ( 51.1%)         | 109 ( 55.9%) |
|       | Yes | 41 ( 39.8%)      | 45 ( 48.9%)         | 86 ( 44.1%)  |
| DAY 7 | n   | 102              | 91                  | 193          |
|       | No  | 62 ( 60.8%)      | 52 ( 57.1%)         | 114 ( 59.1%) |
|       | Yes | 40 ( 39.2%)      | 39 ( 42.9%)         | 79 ( 40.9%)  |
| DAY 8 | n   | 101              | 90                  | 191          |
|       | No  | 69 ( 68.3%)      | 56 ( 62.2%)         | 125 ( 65.4%) |
|       | Yes | 32 ( 31.7%)      | 34 ( 37.8%)         | 66 ( 34.6%)  |
| DAY 9 | n   | 100              | 89                  | 189          |
|       | No  | 73 ( 73.0%)      | 62 ( 69.7%)         | 135 ( 71.4%) |
|       | Yes | 27 ( 27.0%)      | 27 ( 30.3%)         | 54 ( 28.6%)  |

Note:

Comparaisons at day 3,7,10 and 14 are considered for secondary analysis. The other days are used for exploratory analysis.

2 - Efficacy Analysis  
 2.2 - Secondary Analysis

Table 2.2.3i - Summary of and Statistical Analysis for Presence of General Weakness at Day 1 to 14, ITT population

|        |     | Placebo<br>N=109 | Hesperidin<br>N=107 | All<br>N=216 |
|--------|-----|------------------|---------------------|--------------|
| DAY 10 | n   | 100              | 90                  | 190          |
|        | No  | 79 ( 79.0%)      | 70 ( 77.8%)         | 149 ( 78.4%) |
|        | Yes | 21 ( 21.0%)      | 20 ( 22.2%)         | 41 ( 21.6%)  |
| DAY 11 | n   | 98               | 86                  | 184          |
|        | No  | 78 ( 79.6%)      | 67 ( 77.9%)         | 145 ( 78.8%) |
|        | Yes | 20 ( 20.4%)      | 19 ( 22.1%)         | 39 ( 21.2%)  |
| DAY 12 | n   | 99               | 85                  | 184          |
|        | No  | 78 ( 78.8%)      | 69 ( 81.2%)         | 147 ( 79.9%) |
|        | Yes | 21 ( 21.2%)      | 16 ( 18.8%)         | 37 ( 20.1%)  |
| DAY 13 | n   | 98               | 83                  | 181          |
|        | No  | 78 ( 79.6%)      | 68 ( 81.9%)         | 146 ( 80.7%) |
|        | Yes | 20 ( 20.4%)      | 15 ( 18.1%)         | 35 ( 19.3%)  |
| DAY 14 | n   | 95               | 79                  | 174          |
|        | No  | 78 ( 82.1%)      | 65 ( 82.3%)         | 143 ( 82.2%) |
|        | Yes | 17 ( 17.9%)      | 14 ( 17.7%)         | 31 ( 17.8%)  |

Note:  
 Comparisons at day 3,7,10 and 14 are considered for secondary analysis. The other days are used for exploratory analysis.

2 – Efficacy Analysis

2.2 – Secondary Analysis

Table 2.2.3i – Summary of and Statistical Analysis for Presence of General Weakness at Day 1 to 14, ITT Population (continued)

Generalized linear mixed model (repeated binary logistic regression) with terms for treatment group, time and treatment group x time interaction

| Contrast                        | OR (95% CI)       | P-value |
|---------------------------------|-------------------|---------|
| Hesperidin vs Placebo at Day 3  | 1.41 (0.80; 2.47) | 0.2292  |
| Hesperidin vs Placebo at Day 7  | 1.16 (0.65; 2.07) | 0.6097  |
| Hesperidin vs Placebo at Day 10 | 1.07 (0.54; 2.16) | 0.8389  |
| Hesperidin vs Placebo at Day 14 | 0.99 (0.45; 2.17) | 0.9764  |

2 - Efficacy Analysis  
2.2 - Secondary Analysis

Table 2.2.3j - Summary of and Statistical Analysis for Presence of Pain at Day 1 to 14, ITT population

|       |     | Placebo<br>N=109 | Hesperidin<br>N=107 | All<br>N=216 |
|-------|-----|------------------|---------------------|--------------|
| DAY 1 | n   | 107              | 105                 | 212          |
|       | No  | 44 ( 41.1%)      | 43 ( 41.0%)         | 87 ( 41.0%)  |
|       | Yes | 63 ( 58.9%)      | 62 ( 59.0%)         | 125 ( 59.0%) |
| DAY 2 | n   | 106              | 105                 | 211          |
|       | No  | 55 ( 51.9%)      | 47 ( 44.8%)         | 102 ( 48.3%) |
|       | Yes | 51 ( 48.1%)      | 58 ( 55.2%)         | 109 ( 51.7%) |
| DAY 3 | n   | 103              | 102                 | 205          |
|       | No  | 53 ( 51.5%)      | 58 ( 56.9%)         | 111 ( 54.1%) |
|       | Yes | 50 ( 48.5%)      | 44 ( 43.1%)         | 94 ( 45.9%)  |
| DAY 4 | n   | 103              | 96                  | 199          |
|       | No  | 65 ( 63.1%)      | 63 ( 65.6%)         | 128 ( 64.3%) |
|       | Yes | 38 ( 36.9%)      | 33 ( 34.4%)         | 71 ( 35.7%)  |
| DAY 5 | n   | 102              | 95                  | 197          |
|       | No  | 69 ( 67.6%)      | 68 ( 71.6%)         | 137 ( 69.5%) |
|       | Yes | 33 ( 32.4%)      | 27 ( 28.4%)         | 60 ( 30.5%)  |
| DAY 6 | n   | 103              | 92                  | 195          |
|       | No  | 79 ( 76.7%)      | 71 ( 77.2%)         | 150 ( 76.9%) |
|       | Yes | 24 ( 23.3%)      | 21 ( 22.8%)         | 45 ( 23.1%)  |
| DAY 7 | n   | 102              | 91                  | 193          |
|       | No  | 79 ( 77.5%)      | 74 ( 81.3%)         | 153 ( 79.3%) |
|       | Yes | 23 ( 22.5%)      | 17 ( 18.7%)         | 40 ( 20.7%)  |
| DAY 8 | n   | 101              | 90                  | 191          |
|       | No  | 82 ( 81.2%)      | 77 ( 85.6%)         | 159 ( 83.2%) |
|       | Yes | 19 ( 18.8%)      | 13 ( 14.4%)         | 32 ( 16.8%)  |
| DAY 9 | n   | 100              | 89                  | 189          |
|       | No  | 84 ( 84.0%)      | 76 ( 85.4%)         | 160 ( 84.7%) |
|       | Yes | 16 ( 16.0%)      | 13 ( 14.6%)         | 29 ( 15.3%)  |

Note:

Comparaisons at day 3,7,10 and 14 are considered for secondary analysis. The other days are used for exploratory analysis.

2 - Efficacy Analysis

2.2 - Secondary Analysis

Table 2.2.3j - Summary of and Statistical Analysis for Presence of Pain at Day 1 to 14, ITT population

|        |     | Placebo<br>N=109 | Hesperidin<br>N=107 | All<br>N=216 |
|--------|-----|------------------|---------------------|--------------|
| DAY 10 | n   | 100              | 90                  | 190          |
|        | No  | 86 ( 86.0%)      | 77 ( 85.6%)         | 163 ( 85.8%) |
|        | Yes | 14 ( 14.0%)      | 13 ( 14.4%)         | 27 ( 14.2%)  |
| DAY 11 | n   | 98               | 86                  | 184          |
|        | No  | 86 ( 87.8%)      | 77 ( 89.5%)         | 163 ( 88.6%) |
|        | Yes | 12 ( 12.2%)      | 9 ( 10.5%)          | 21 ( 11.4%)  |
| DAY 12 | n   | 99               | 85                  | 184          |
|        | No  | 89 ( 89.9%)      | 79 ( 92.9%)         | 168 ( 91.3%) |
|        | Yes | 10 ( 10.1%)      | 6 ( 7.1%)           | 16 ( 8.7%)   |
| DAY 13 | n   | 98               | 83                  | 181          |
|        | No  | 89 ( 90.8%)      | 78 ( 94.0%)         | 167 ( 92.3%) |
|        | Yes | 9 ( 9.2%)        | 5 ( 6.0%)           | 14 ( 7.7%)   |
| DAY 14 | n   | 95               | 79                  | 174          |
|        | No  | 87 ( 91.6%)      | 74 ( 93.7%)         | 161 ( 92.5%) |
|        | Yes | 8 ( 8.4%)        | 5 ( 6.3%)           | 13 ( 7.5%)   |

Note:

Comparaisons at day 3,7,10 and 14 are considered for secondary analysis. The other days are used for exploratory analysis.

2 – Efficacy Analysis

2.2 – Secondary Analysis

Table 2.2.3j – Summary of and Statistical Analysis for Presence of Pain at Day 1 to 14, ITT Population (continued)

Generalized linear mixed model (repeated binary logistic regression) with terms for treatment group, time and treatment group x time interaction

| Contrast                        | OR (95% CI)       | P-value |
|---------------------------------|-------------------|---------|
| Hesperidin vs Placebo at Day 3  | 0.80 (0.46; 1.40) | 0.4403  |
| Hesperidin vs Placebo at Day 7  | 0.79 (0.39; 1.60) | 0.5112  |
| Hesperidin vs Placebo at Day 10 | 1.04 (0.46; 2.36) | 0.9306  |
| Hesperidin vs Placebo at Day 14 | 0.73 (0.23; 2.36) | 0.6046  |

2 - Efficacy Analysis  
2.2 - Secondary Analysis

Table 2.2.3k - Summary of and Statistical Analysis for Presence of Irritability/Confusion at Day 1 to 14, ITT population

|       |     | Placebo<br>N=109 | Hesperidin<br>N=107 | All<br>N=216 |
|-------|-----|------------------|---------------------|--------------|
| DAY 1 | n   | 107              | 105                 | 212          |
|       | No  | 79 ( 73.8%)      | 80 ( 76.2%)         | 159 ( 75.0%) |
|       | Yes | 28 ( 26.2%)      | 25 ( 23.8%)         | 53 ( 25.0%)  |
| DAY 2 | n   | 106              | 105                 | 211          |
|       | No  | 80 ( 75.5%)      | 83 ( 79.0%)         | 163 ( 77.3%) |
|       | Yes | 26 ( 24.5%)      | 22 ( 21.0%)         | 48 ( 22.7%)  |
| DAY 3 | n   | 103              | 102                 | 205          |
|       | No  | 85 ( 82.5%)      | 82 ( 80.4%)         | 167 ( 81.5%) |
|       | Yes | 18 ( 17.5%)      | 20 ( 19.6%)         | 38 ( 18.5%)  |
| DAY 4 | n   | 103              | 96                  | 199          |
|       | No  | 83 ( 80.6%)      | 77 ( 80.2%)         | 160 ( 80.4%) |
|       | Yes | 20 ( 19.4%)      | 19 ( 19.8%)         | 39 ( 19.6%)  |
| DAY 5 | n   | 102              | 95                  | 197          |
|       | No  | 87 ( 85.3%)      | 85 ( 89.5%)         | 172 ( 87.3%) |
|       | Yes | 15 ( 14.7%)      | 10 ( 10.5%)         | 25 ( 12.7%)  |
| DAY 6 | n   | 103              | 92                  | 195          |
|       | No  | 91 ( 88.3%)      | 81 ( 88.0%)         | 172 ( 88.2%) |
|       | Yes | 12 ( 11.7%)      | 11 ( 12.0%)         | 23 ( 11.8%)  |
| DAY 7 | n   | 102              | 91                  | 193          |
|       | No  | 92 ( 90.2%)      | 85 ( 93.4%)         | 177 ( 91.7%) |
|       | Yes | 10 ( 9.8%)       | 6 ( 6.6%)           | 16 ( 8.3%)   |
| DAY 8 | n   | 101              | 90                  | 191          |
|       | No  | 92 ( 91.1%)      | 85 ( 94.4%)         | 177 ( 92.7%) |
|       | Yes | 9 ( 8.9%)        | 5 ( 5.6%)           | 14 ( 7.3%)   |
| DAY 9 | n   | 100              | 89                  | 189          |
|       | No  | 94 ( 94.0%)      | 84 ( 94.4%)         | 178 ( 94.2%) |
|       | Yes | 6 ( 6.0%)        | 5 ( 5.6%)           | 11 ( 5.8%)   |

Note:

Comparaisons at day 3,7,10 and 14 are considered for secondary analysis. The other days are used for exploratory analysis.

2 - Efficacy Analysis  
2.2 - Secondary Analysis

Table 2.2.3k - Summary of and Statistical Analysis for Presence of Irritability/Confusion at Day 1 to 14, ITT population

|        |     | Placebo<br>N=109 | Hesperidin<br>N=107 | All<br>N=216 |
|--------|-----|------------------|---------------------|--------------|
| DAY 10 | n   | 100              | 90                  | 190          |
|        | No  | 96 ( 96.0%)      | 86 ( 95.6%)         | 182 ( 95.8%) |
|        | Yes | 4 ( 4.0%)        | 4 ( 4.4%)           | 8 ( 4.2%)    |
| DAY 11 | n   | 98               | 86                  | 184          |
|        | No  | 93 ( 94.9%)      | 82 ( 95.3%)         | 175 ( 95.1%) |
|        | Yes | 5 ( 5.1%)        | 4 ( 4.7%)           | 9 ( 4.9%)    |
| DAY 12 | n   | 99               | 85                  | 184          |
|        | No  | 97 ( 98.0%)      | 82 ( 96.5%)         | 179 ( 97.3%) |
|        | Yes | 2 ( 2.0%)        | 3 ( 3.5%)           | 5 ( 2.7%)    |
| DAY 13 | n   | 98               | 83                  | 181          |
|        | No  | 96 ( 98.0%)      | 80 ( 96.4%)         | 176 ( 97.2%) |
|        | Yes | 2 ( 2.0%)        | 3 ( 3.6%)           | 5 ( 2.8%)    |
| DAY 14 | n   | 95               | 79                  | 174          |
|        | No  | 94 ( 98.9%)      | 76 ( 96.2%)         | 170 ( 97.7%) |
|        | Yes | 1 ( 1.1%)        | 3 ( 3.8%)           | 4 ( 2.3%)    |

Note:

Comparaisons at day 3,7,10 and 14 are considered for secondary analysis. The other days are used for exploratory analysis.



2 – Efficacy Analysis

2.2 – Secondary Analysis

Table 2.2.3k – Summary of and Statistical Analysis for Presence of Irritability/Confusion at Day 1 to 14, ITT Population (continued)

Generalized linear mixed model (repeated binary logistic regression) with terms for treatment group, time and treatment group x time interaction

| Contrast                        | OR (95% CI)        | P-value |
|---------------------------------|--------------------|---------|
| Hesperidin vs Placebo at Day 3  | 1.15 (0.57; 2.34)  | 0.6963  |
| Hesperidin vs Placebo at Day 7  | 0.65 (0.22; 1.88)  | 0.4250  |
| Hesperidin vs Placebo at Day 10 | 1.12 (0.27; 4.65)  | 0.8797  |
| Hesperidin vs Placebo at Day 14 | 3.71 (0.37; 37.03) | 0.2634  |

2 - Efficacy Analysis  
2.2 - Secondary Analysis

Table 2.2.31 - Summary of and Statistical Analysis for Presence of Diarrhea at Day 1 to 14, ITT population

|       |     | Placebo<br>N=109 | Hesperidin<br>N=107 | All<br>N=216 |
|-------|-----|------------------|---------------------|--------------|
| DAY 1 | n   | 107              | 105                 | 212          |
|       | No  | 85 ( 79.4%)      | 82 ( 78.1%)         | 167 ( 78.8%) |
|       | Yes | 22 ( 20.6%)      | 23 ( 21.9%)         | 45 ( 21.2%)  |
| DAY 2 | n   | 106              | 105                 | 211          |
|       | No  | 84 ( 79.2%)      | 83 ( 79.0%)         | 167 ( 79.1%) |
|       | Yes | 22 ( 20.8%)      | 22 ( 21.0%)         | 44 ( 20.9%)  |
| DAY 3 | n   | 103              | 102                 | 205          |
|       | No  | 87 ( 84.5%)      | 80 ( 78.4%)         | 167 ( 81.5%) |
|       | Yes | 16 ( 15.5%)      | 22 ( 21.6%)         | 38 ( 18.5%)  |
| DAY 4 | n   | 103              | 96                  | 199          |
|       | No  | 90 ( 87.4%)      | 72 ( 75.0%)         | 162 ( 81.4%) |
|       | Yes | 13 ( 12.6%)      | 24 ( 25.0%)         | 37 ( 18.6%)  |
| DAY 5 | n   | 102              | 95                  | 197          |
|       | No  | 89 ( 87.3%)      | 76 ( 80.0%)         | 165 ( 83.8%) |
|       | Yes | 13 ( 12.7%)      | 19 ( 20.0%)         | 32 ( 16.2%)  |
| DAY 6 | n   | 103              | 92                  | 195          |
|       | No  | 92 ( 89.3%)      | 72 ( 78.3%)         | 164 ( 84.1%) |
|       | Yes | 11 ( 10.7%)      | 20 ( 21.7%)         | 31 ( 15.9%)  |
| DAY 7 | n   | 102              | 91                  | 193          |
|       | No  | 92 ( 90.2%)      | 76 ( 83.5%)         | 168 ( 87.0%) |
|       | Yes | 10 ( 9.8%)       | 15 ( 16.5%)         | 25 ( 13.0%)  |
| DAY 8 | n   | 101              | 90                  | 191          |
|       | No  | 92 ( 91.1%)      | 77 ( 85.6%)         | 169 ( 88.5%) |
|       | Yes | 9 ( 8.9%)        | 13 ( 14.4%)         | 22 ( 11.5%)  |
| DAY 9 | n   | 100              | 89                  | 189          |
|       | No  | 92 ( 92.0%)      | 81 ( 91.0%)         | 173 ( 91.5%) |
|       | Yes | 8 ( 8.0%)        | 8 ( 9.0%)           | 16 ( 8.5%)   |

Note:

Comparaisons at day 3,7,10 and 14 are considered for secondary analysis. The other days are used for exploratory analysis.

2 - Efficacy Analysis  
2.2 - Secondary Analysis

Table 2.2.31 - Summary of and Statistical Analysis for Presence of Diarrhea at Day 1 to 14, ITT population

|        |     | Placebo<br>N=109 | Hesperidin<br>N=107 | All<br>N=216 |
|--------|-----|------------------|---------------------|--------------|
| DAY 10 | n   | 100              | 90                  | 190          |
|        | No  | 94 ( 94.0%)      | 84 ( 93.3%)         | 178 ( 93.7%) |
|        | Yes | 6 ( 6.0%)        | 6 ( 6.7%)           | 12 ( 6.3%)   |
| DAY 11 | n   | 98               | 86                  | 184          |
|        | No  | 94 ( 95.9%)      | 79 ( 91.9%)         | 173 ( 94.0%) |
|        | Yes | 4 ( 4.1%)        | 7 ( 8.1%)           | 11 ( 6.0%)   |
| DAY 12 | n   | 99               | 85                  | 184          |
|        | No  | 96 ( 97.0%)      | 77 ( 90.6%)         | 173 ( 94.0%) |
|        | Yes | 3 ( 3.0%)        | 8 ( 9.4%)           | 11 ( 6.0%)   |
| DAY 13 | n   | 98               | 83                  | 181          |
|        | No  | 94 ( 95.9%)      | 76 ( 91.6%)         | 170 ( 93.9%) |
|        | Yes | 4 ( 4.1%)        | 7 ( 8.4%)           | 11 ( 6.1%)   |
| DAY 14 | n   | 95               | 79                  | 174          |
|        | No  | 91 ( 95.8%)      | 75 ( 94.9%)         | 166 ( 95.4%) |
|        | Yes | 4 ( 4.2%)        | 4 ( 5.1%)           | 8 ( 4.6%)    |

Note:

Comparaisons at day 3,7,10 and 14 are considered for secondary analysis. The other days are used for exploratory analysis.

2 – Efficacy Analysis

2.2 – Secondary Analysis

Table 2.2.31 – Summary of and Statistical Analysis for Presence of Diarrhea at Day 1 to 14, ITT Population (continued)

Generalized linear mixed model (repeated binary logistic regression) with terms for treatment group, time and treatment group x time interaction

| Contrast                        | OR (95% CI)       | P-value |
|---------------------------------|-------------------|---------|
| Hesperidin vs Placebo at Day 3  | 1.50 (0.73; 3.06) | 0.2710  |
| Hesperidin vs Placebo at Day 7  | 1.82 (0.77; 4.30) | 0.1748  |
| Hesperidin vs Placebo at Day 10 | 1.12 (0.34; 3.63) | 0.8513  |
| Hesperidin vs Placebo at Day 14 | 1.21 (0.29; 5.07) | 0.7906  |

2 - Efficacy Analysis  
2.2 - Secondary Analysis

Table 2.2.3m - Summary of and Statistical Analysis for Presence of Anosmia at Day 1 to 14, ITT Population

|       |     | Placebo<br>N=109 | Hesperidin<br>N=107 | All<br>N=216 |
|-------|-----|------------------|---------------------|--------------|
| DAY 1 | n   | 107              | 105                 | 212          |
|       | No  | 57 ( 53.3%)      | 62 ( 59.0%)         | 119 ( 56.1%) |
|       | Yes | 50 ( 46.7%)      | 43 ( 41.0%)         | 93 ( 43.9%)  |
| DAY 2 | n   | 106              | 105                 | 211          |
|       | No  | 52 ( 49.1%)      | 56 ( 53.3%)         | 108 ( 51.2%) |
|       | Yes | 54 ( 50.9%)      | 49 ( 46.7%)         | 103 ( 48.8%) |
| DAY 3 | n   | 103              | 102                 | 205          |
|       | No  | 44 ( 42.7%)      | 50 ( 49.0%)         | 94 ( 45.9%)  |
|       | Yes | 59 ( 57.3%)      | 52 ( 51.0%)         | 111 ( 54.1%) |
| DAY 4 | n   | 103              | 96                  | 199          |
|       | No  | 44 ( 42.7%)      | 48 ( 50.0%)         | 92 ( 46.2%)  |
|       | Yes | 59 ( 57.3%)      | 48 ( 50.0%)         | 107 ( 53.8%) |
| DAY 5 | n   | 102              | 95                  | 197          |
|       | No  | 45 ( 44.1%)      | 45 ( 47.4%)         | 90 ( 45.7%)  |
|       | Yes | 57 ( 55.9%)      | 50 ( 52.6%)         | 107 ( 54.3%) |
| DAY 6 | n   | 103              | 92                  | 195          |
|       | No  | 52 ( 50.5%)      | 43 ( 46.7%)         | 95 ( 48.7%)  |
|       | Yes | 51 ( 49.5%)      | 49 ( 53.3%)         | 100 ( 51.3%) |
| DAY 7 | n   | 102              | 91                  | 193          |
|       | No  | 55 ( 53.9%)      | 48 ( 52.7%)         | 103 ( 53.4%) |
|       | Yes | 47 ( 46.1%)      | 43 ( 47.3%)         | 90 ( 46.6%)  |
| DAY 8 | n   | 101              | 90                  | 191          |
|       | No  | 60 ( 59.4%)      | 50 ( 55.6%)         | 110 ( 57.6%) |
|       | Yes | 41 ( 40.6%)      | 40 ( 44.4%)         | 81 ( 42.4%)  |
| DAY 9 | n   | 100              | 89                  | 189          |
|       | No  | 61 ( 61.0%)      | 51 ( 57.3%)         | 112 ( 59.3%) |
|       | Yes | 39 ( 39.0%)      | 38 ( 42.7%)         | 77 ( 40.7%)  |

Note:

Comparaisons at day 3,7,10 and 14 are considered for secondary analysis. The other days are used for exploratory analysis.

2 - Efficacy Analysis  
2.2 - Secondary Analysis

Table 2.2.3m - Summary of and Statistical Analysis for Presence of Anosmia at Day 1 to 14, ITT Population

|        |     | Placebo<br>N=109 | Hesperidin<br>N=107 | All<br>N=216 |
|--------|-----|------------------|---------------------|--------------|
| DAY 10 | n   | 100              | 90                  | 190          |
|        | No  | 63 ( 63.0%)      | 56 ( 62.2%)         | 119 ( 62.6%) |
|        | Yes | 37 ( 37.0%)      | 34 ( 37.8%)         | 71 ( 37.4%)  |
| DAY 11 | n   | 98               | 86                  | 184          |
|        | No  | 63 ( 64.3%)      | 55 ( 64.0%)         | 118 ( 64.1%) |
|        | Yes | 35 ( 35.7%)      | 31 ( 36.0%)         | 66 ( 35.9%)  |
| DAY 12 | n   | 99               | 85                  | 184          |
|        | No  | 65 ( 65.7%)      | 58 ( 68.2%)         | 123 ( 66.8%) |
|        | Yes | 34 ( 34.3%)      | 27 ( 31.8%)         | 61 ( 33.2%)  |
| DAY 13 | n   | 98               | 83                  | 181          |
|        | No  | 65 ( 66.3%)      | 58 ( 69.9%)         | 123 ( 68.0%) |
|        | Yes | 33 ( 33.7%)      | 25 ( 30.1%)         | 58 ( 32.0%)  |
| DAY 14 | n   | 95               | 79                  | 174          |
|        | No  | 64 ( 67.4%)      | 59 ( 74.7%)         | 123 ( 70.7%) |
|        | Yes | 31 ( 32.6%)      | 20 ( 25.3%)         | 51 ( 29.3%)  |

Note:  
Comparaisons at day 3,7,10 and 14 are considered for secondary analysis. The other days are used for exploratory analysis.

2 – Efficacy Analysis

2.2 – Secondary Analysis

Table 2.2.3m – Summary of and Statistical Analysis for Presence of Anosmia at Day 1 to 14, ITT Population (continued)

Generalized linear mixed model (repeated binary logistic regression) with terms for treatment group, time and treatment group x time interaction

| Contrast                        | OR (95% CI)       | P-value |
|---------------------------------|-------------------|---------|
| Hesperidin vs Placebo at Day 3  | 0.78 (0.45; 1.35) | 0.3686  |
| Hesperidin vs Placebo at Day 7  | 1.05 (0.59; 1.86) | 0.8711  |
| Hesperidin vs Placebo at Day 10 | 1.03 (0.57; 1.87) | 0.9124  |
| Hesperidin vs Placebo at Day 14 | 0.70 (0.36; 1.37) | 0.2952  |
